# Supplementary material
Source: PubMed Central journal article supplement (PMC4666838)
Supplement: NIHMS696756-supplement-01.pdf [file NIHMS696756-supplement-01.pdf]

Ricoult, *et al.*

## Supplemental Figures

**Figure S1.** Effects of mTOR inhibitors and SREBP1/2 knockdowns on the induction of *SREBF1*, *SREBF2*, and *ACACA* transcription by oncogenic PI3K and K-Ras. **(a)**

Oncogene and mTORC1-dependent regulation of *SREBF1*, *SREBF2*, and *ACACA* gene expression. RNA was isolated from MCF10a cells (from **2b**) stably expressing empty vector, PIK3CA<sup>H1047R</sup>, or K-Ras<sup>G12V</sup> serum starved for 16 h in the presence of vehicle, rapamycin (20 nM), or Torin1 (250 nM) for analysis by qRT-PCR, n=2. **(b)** Effect of SREBP knockdown on *SREBF1*, *SREBF2*, and *ACACA* gene expression. MCF10a cells from **2c** were transfected with siRNAs targeting SREBP1, SREBP2, or both. RNA was isolated from cells 72 h post-transfection following 20 h starvation, n=3. Representative data are shown as mean  $\pm$  s.e.m. relative to vector-expressing cells. # P-value < 0.05 compared to vector-expressing cells; \* P-value < 0.05 compared to vehicle-treated cells expressing the same oncogene.

**Figure S2.** mTOR inhibitors decreases the expression of SREBP and its target genes in breast cancer cells. **(a)** mTORC1-dependent *SREBF1* and *SREBF2* expression in breast cancer cells. qRT-PCR analysis of RNA isolated from cells (from **3b**) serum starved for 18 h in the presence of vehicle, rapamycin (20 nM), or Torin1 (250 nM). Data are shown as mean  $\pm$  s.e.m. relative to vehicle-treated cells. \* P-value < 0.05 compared to vehicle-treated cells. **(b)** Immunoblots demonstrating the specificity of SREBP1 and SREBP2 antibodies. MDA-MB-468, MDA-MB-453, and Hs578T cells were transfected with siRNAs targeting SREBP1 and SREBP2 for 72 h. Cytosolic and nuclear fractions

were collected after 18 h serum starvation to detect the cytosolic precursor (P) and the nuclear mature (M) forms of SREBP1 and 2, and the C-terminal cleaved form of SREBP2 (C). (c) Effect of long-term mTOR inhibition on FASN and SCD levels. MDA-MB-453 cells were serum starved for 96 h and rapamycin (20 nM) or Torin1 (250 nM) was added in 24 h increments.

**Figure S3.** Effect of SREBP1 or SREBP2 knockdown on expression of *SREBF1*, *SREBF2*, and *SCD* in breast cancer cells. Breast cancer cells were transfected with siRNAs targeting SREBP1, 2 or both. RNA was extracted for qRT-PCR analysis 72 h after transfection, following 18 h serum starvation. Representative data are shown as mean  $\pm$  s.e.m. relative to vehicle-treated cells, n=2. \* P-value < 0.05 compared to cells with control siRNAs.

**Figure S4.** Effects of SREBP1 and SREBP2 depletion on the proliferation of breast cancer cells in full, lipid-rich serum. MDA-MB-468, MDA-MB-453, and Hs578T cells were transfected with siRNAs targeting SREBP1, SREBP2, or both. Cells cultured in full serum were counted every 24 h, starting 24 h post-transfection (t = 0 h). Data are shown as mean  $\pm$  s.e.m., n=3. \* P-value < 0.05 compared to cells with control siRNAs at that time point.

**Figure S5.** Validation of antibodies for use in tissue array dot blots. MDA-MB-468 cells were serum starved for 20 h in the presence of vehicle or Torin1 (250 nM). Dilutions of protein extract from these cells were spotted onto nitrocellulose membranes and immunoblotted for the indicated proteins.

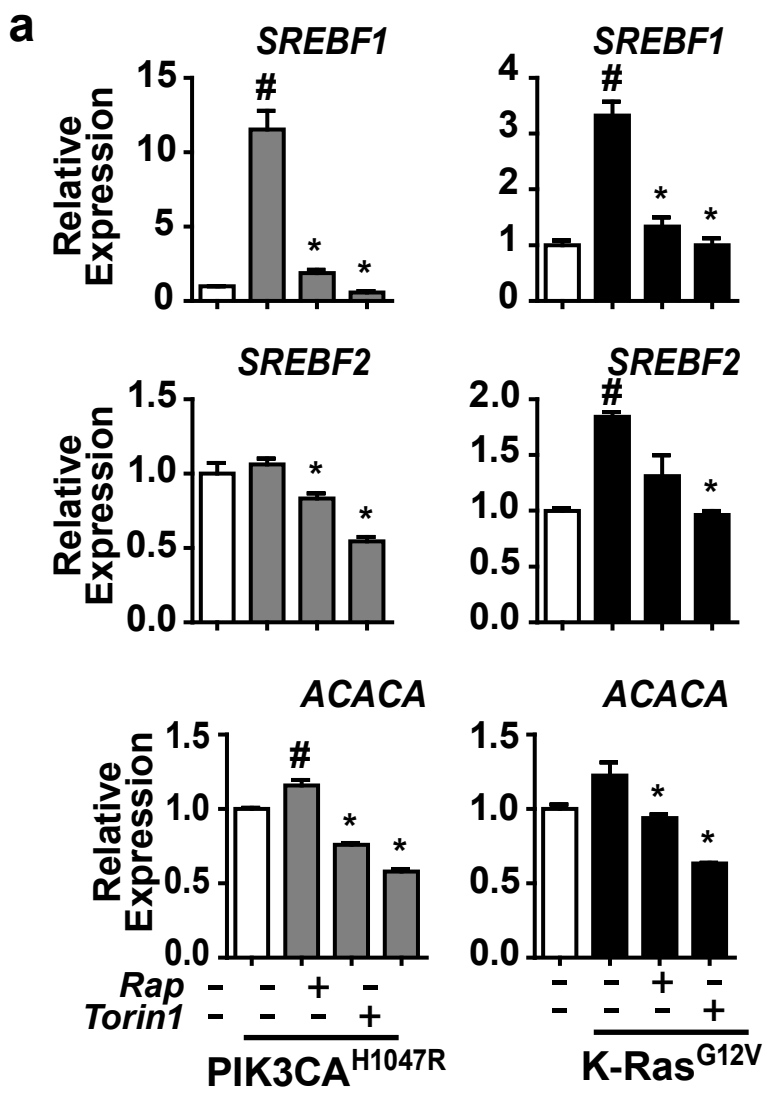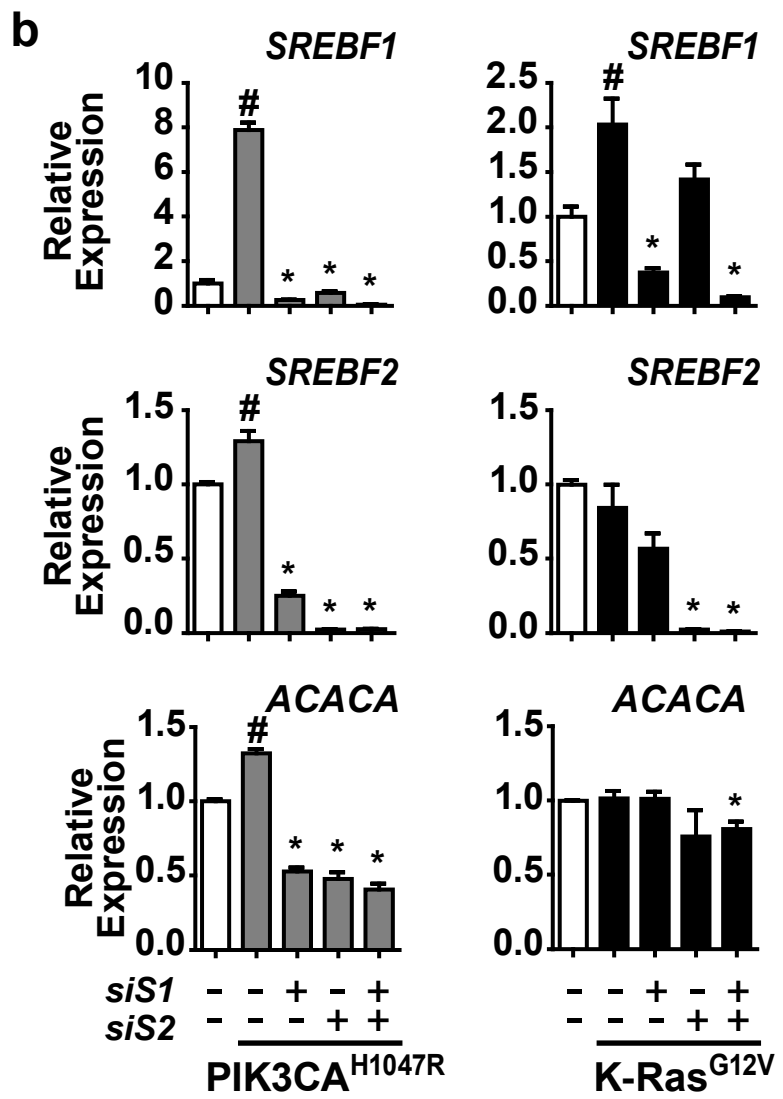

**Figure S1**

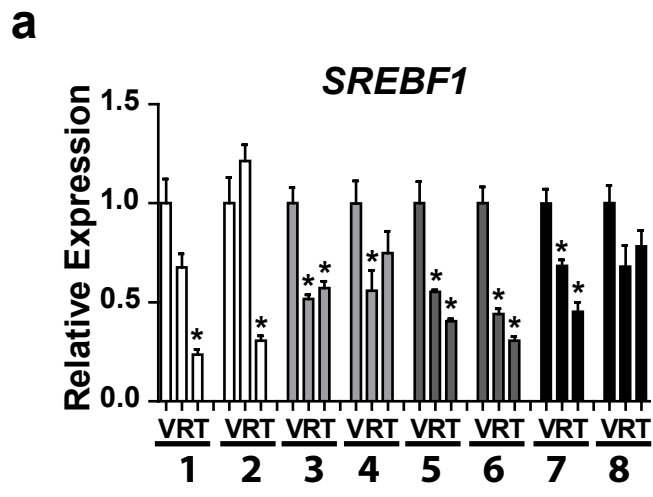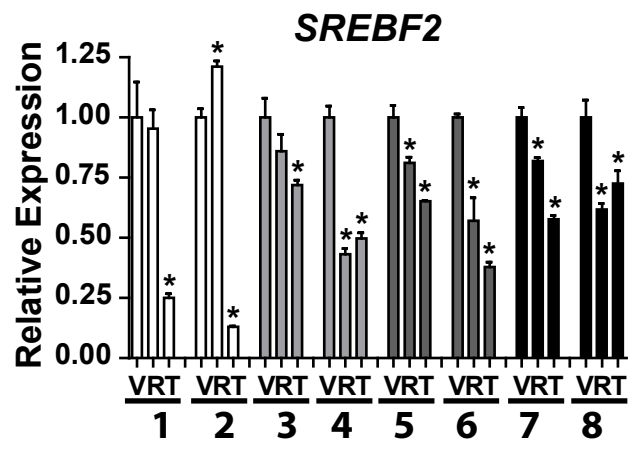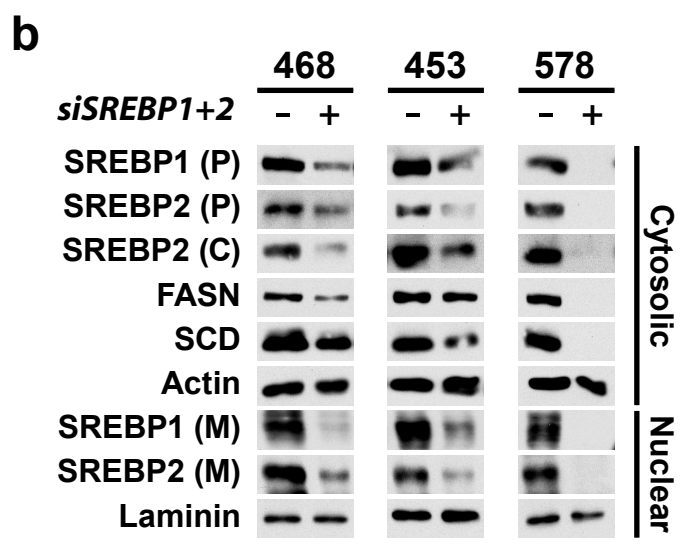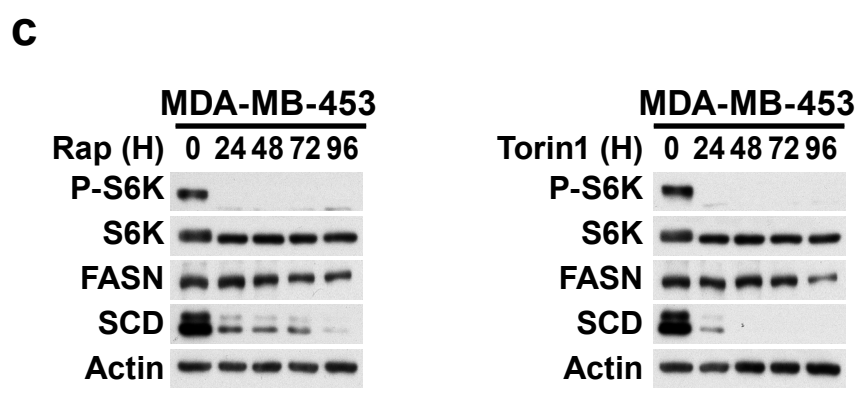

**Figure S2**

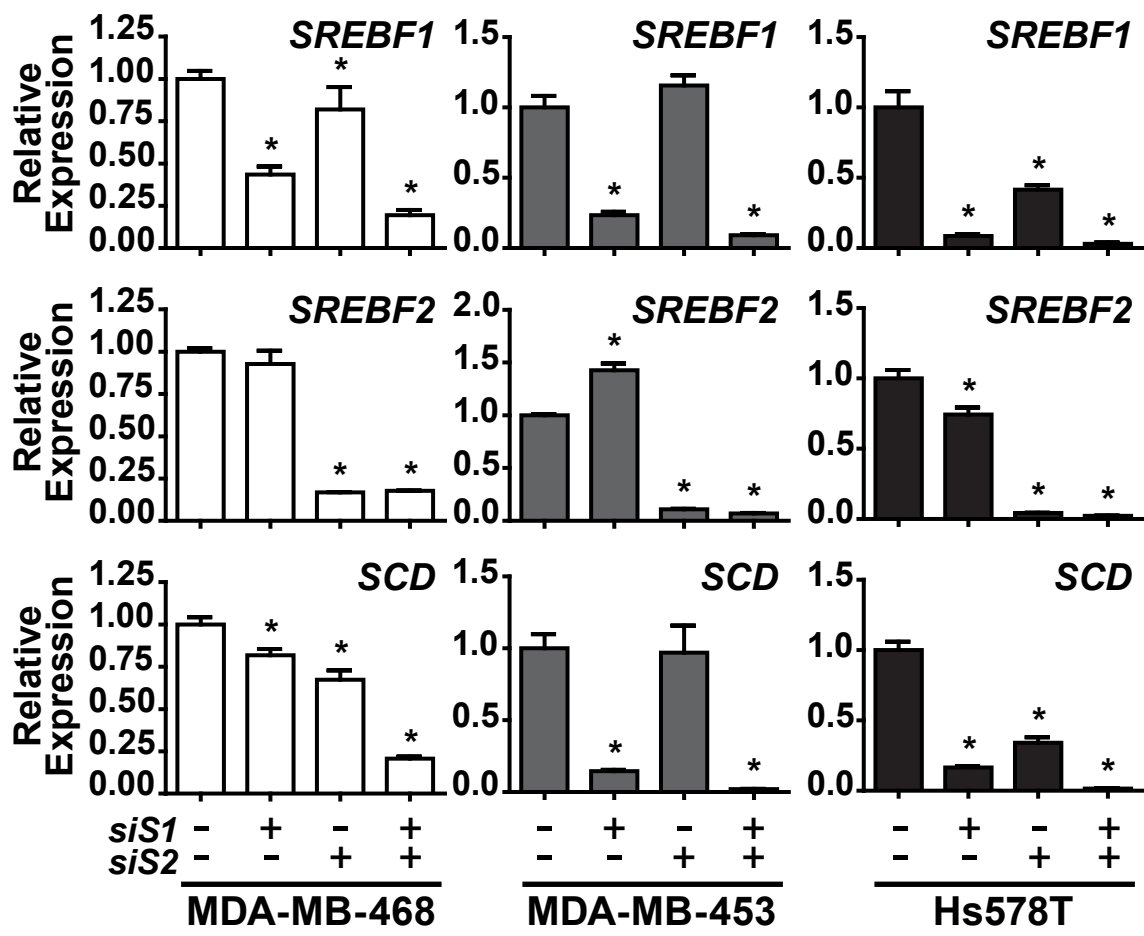

Figure S3

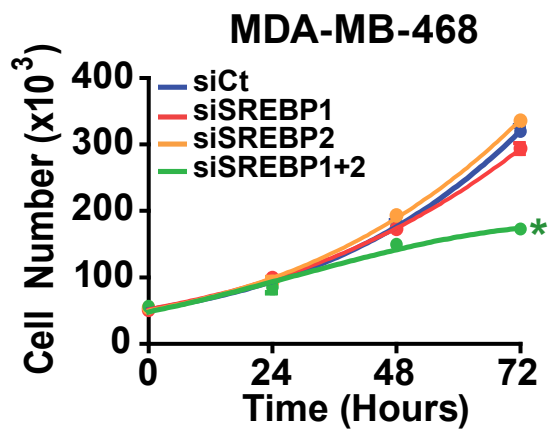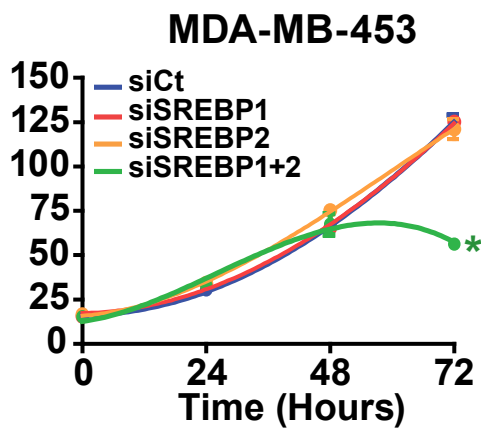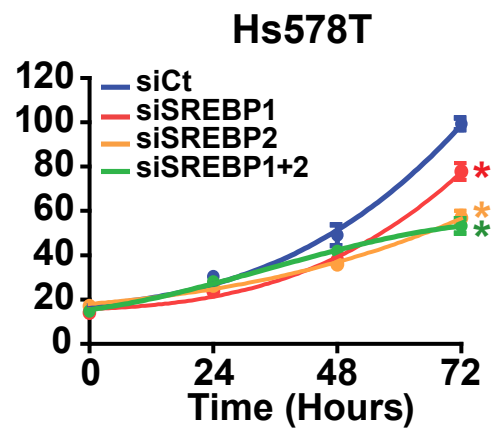

Figure S4

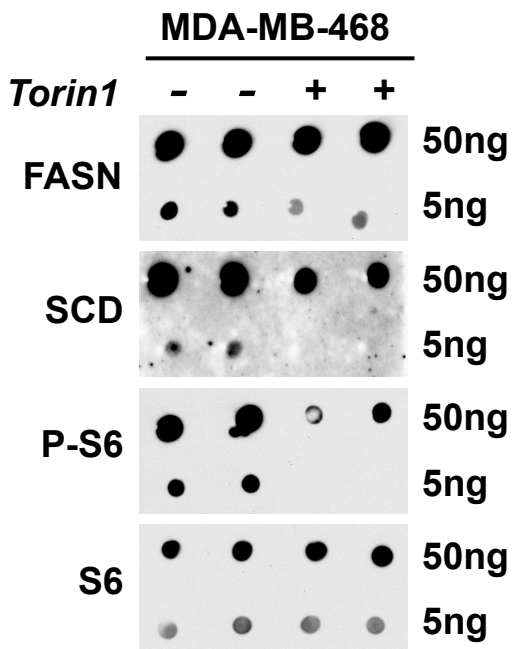

**Figure S5**
